# Supplementary material for: Substance P blocks ovariectomy-induced bone loss by modulating inflammation and potentiating stem cell function
Source: publisher site journal article supplement (doi:10.18632/aging.104008), 2020-10-27
Supplement: Supplementary file [file aging-v12i20-104008-supplementary-material-SD1.pdf]

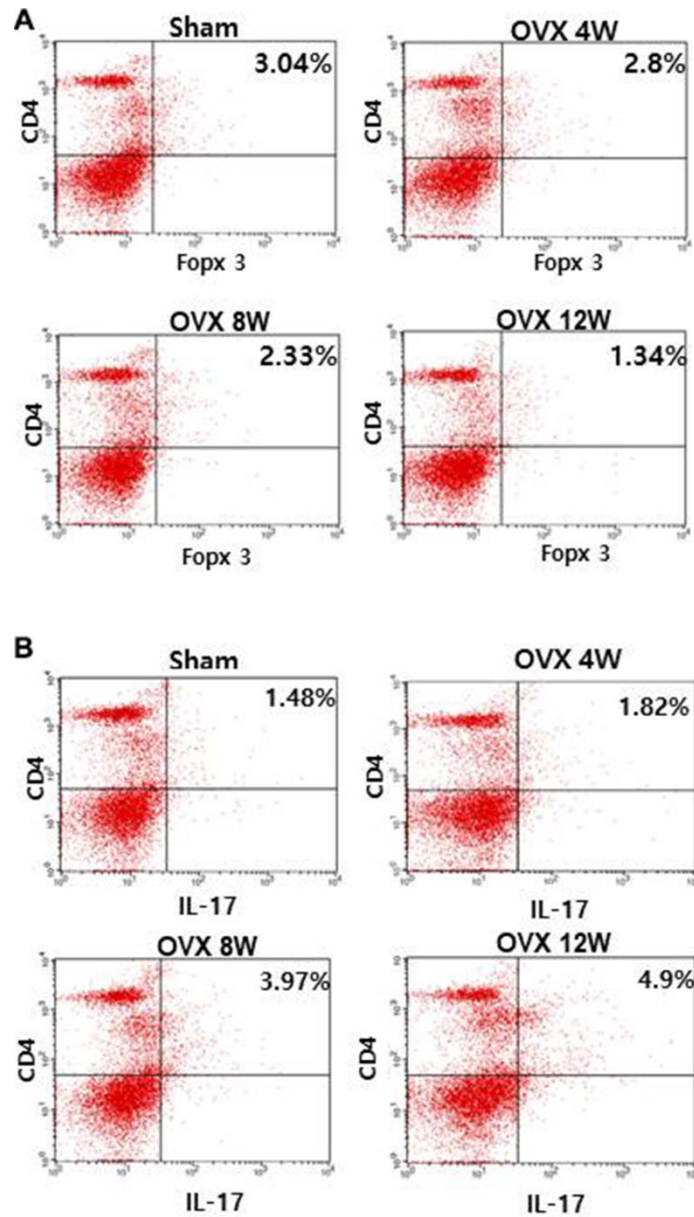

**Supplementary Figure 3. OVX reduces Treg cell pools, enriching Th17 cell pools in the spleen.** The ratios of (A) CD4<sup>+</sup>Foxp3<sup>+</sup> cells and (B) CD4<sup>+</sup>IL17<sup>+</sup> cells in splenocytes were measured by FACS analysis. The data are expressed as the mean  $\pm$  standard deviation (SD) *p* values of less than 0.05 were considered statistically significant (\* *p* < 0.05, \*\* *p* < 0.01, \*\*\* *p* < 0.001). The data are expressed as the mean  $\pm$  standard deviation (SD).

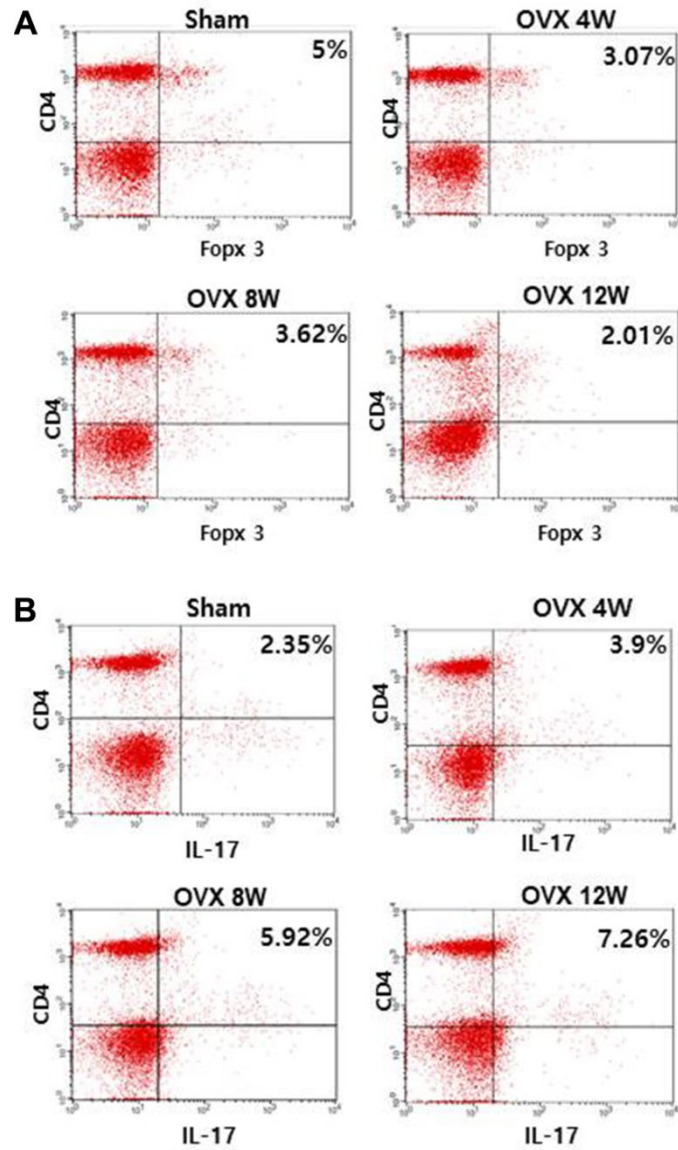

**Supplementary Figure 4. OVX declines Treg cell pools but elevates Th17 cell pools in the mesenteric lymph node.** The ratios of (A) CD4<sup>+</sup>Foxp3<sup>+</sup> cells and (B) CD4<sup>+</sup>IL17<sup>+</sup> cells in MLN cells were measured by FACS analysis. The data are expressed as the mean ± standard deviation (SD) *p* values of less than 0.05 were considered statistically significant (\* *p* < 0.05, \*\* *p* < 0.01, \*\*\* *p* < 0.001). The data are expressed as the mean ± standard deviation (SD).

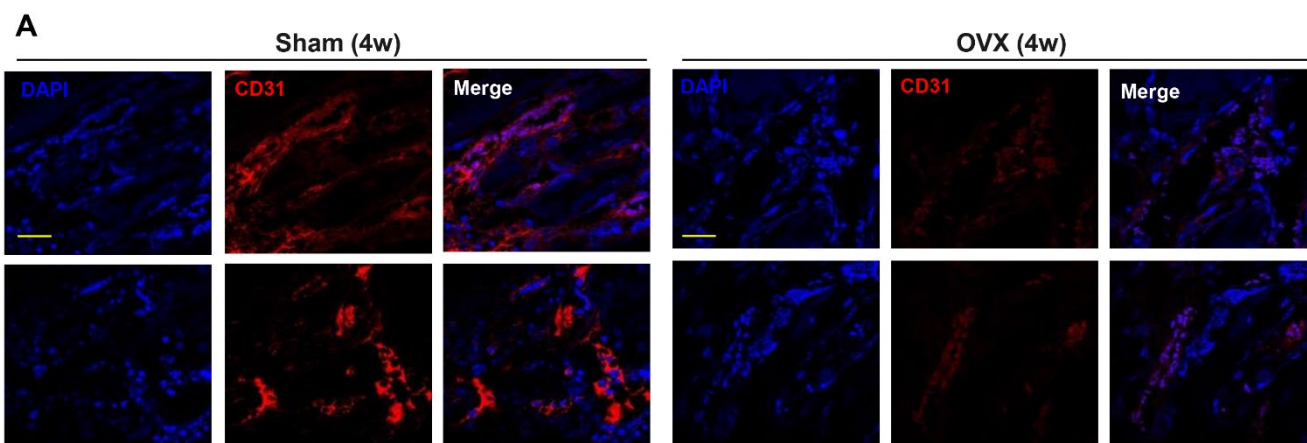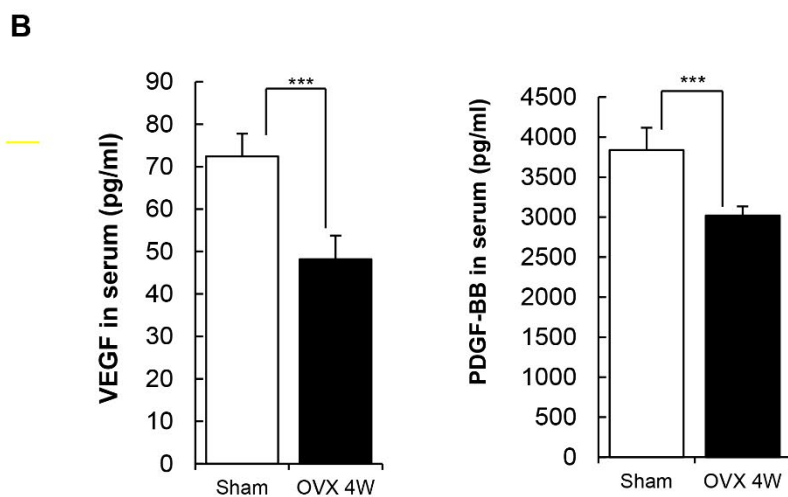

**Supplementary Figure 5. OVX induce vessel damages in bone marrow within 4 weeks.** (A) Representative images of immunofluorescence staining for CD31 (red) in distal femoral metaphysis from rat after sham-operation and OVX for 4 weeks. Scale bar: 200  $\mu$ m. (B) The concentrations of VEGF and PDGF-BB in serum were analyzed by ELISA after 4 weeks of OVX induction and compared with Sham group.  $p$  values of less than 0.05 were considered statistically significant (\*  $p < 0.05$ , \*\*  $p < 0.01$ , \*\*\*  $p < 0.001$ ). The data are expressed as the mean  $\pm$  standard deviation (SD) of three independent experiments.

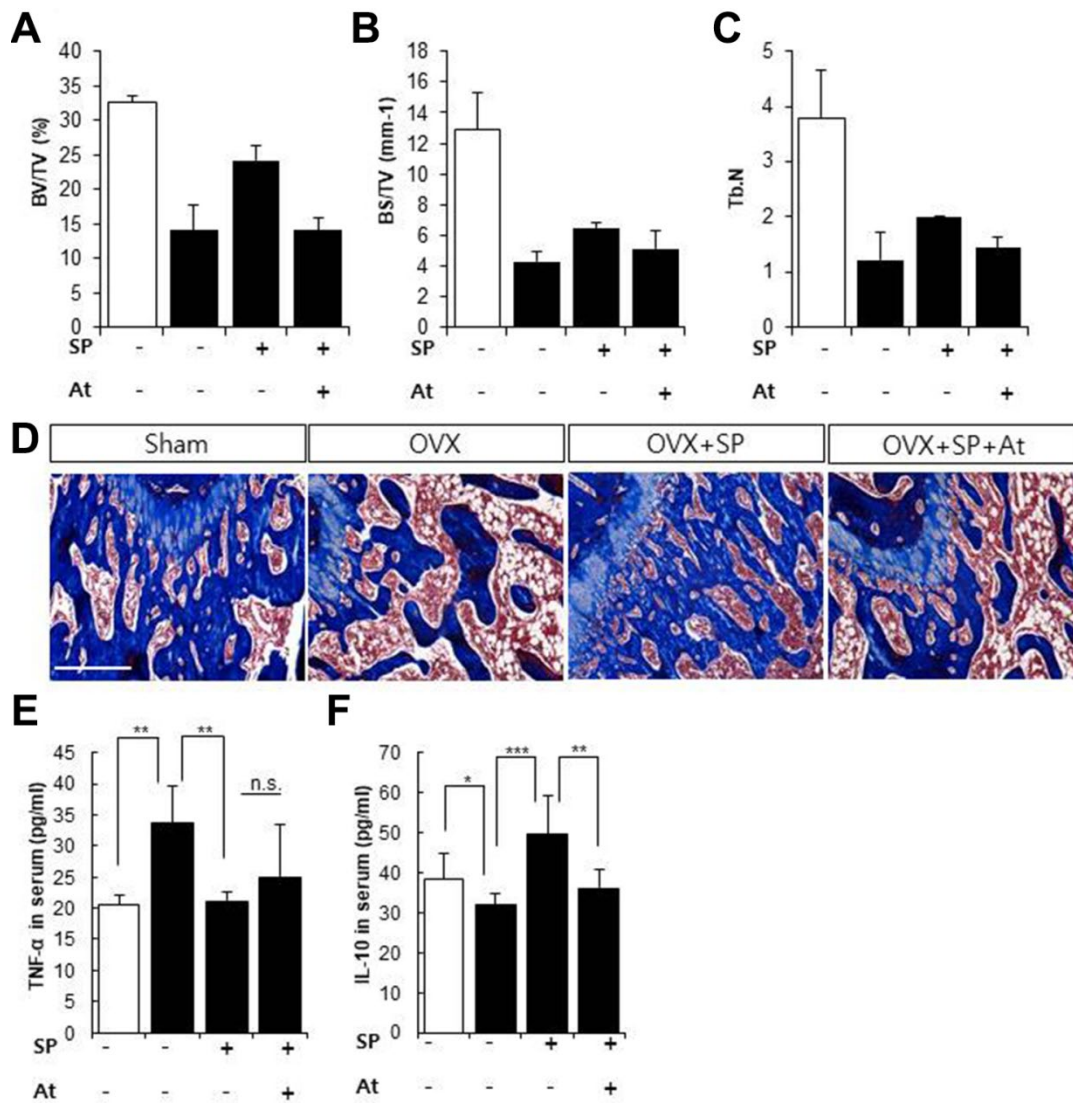

**Supplementary Figure 6. SP ameliorates OVX-induced bone loss via binding NK-1R.** (A–C) Quantitative analyses of the trabecular bone fraction of femur from rats. (D) Masson's Trichrome staining of distal femoral metaphysis sections from rats after sham-operation and OVX. Scale bar: 200  $\mu$ m. (E, F) TNF- $\alpha$  and IL-10 expression levels in serum were analyzed by ELISA. BV: trabecular bone volume. TV: total bone volume. BS: trabecular bone surface. Tb.N: the number of trabecular bone. *p* values of less than 0.05 were considered statistically significant (\* *p* < 0.05, \*\* *p* < 0.01, \*\*\* *p* < 0.001). The data are expressed as the mean  $\pm$  standard deviation (SD) of three independent experiments.

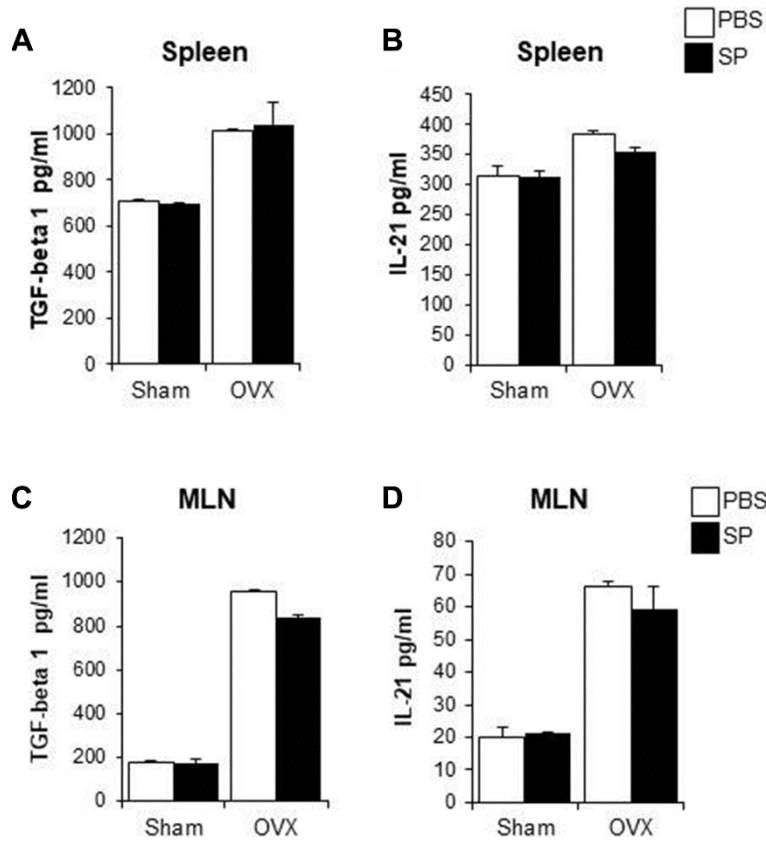

**Supplementary Figure 7. SP does not affect TGF-beta and IL-21 production from 2<sup>nd</sup> lymphoid organ.** TGF-beta 1 (A) and IL-21 (B) expression levels in conditioned medium of splenocytes were analyzed by ELISA. The concentrations of TGF-beta 1 (C) and IL-21 (D) in conditioned medium of MLN cells were analyzed by ELISA. *p* values of less than 0.05 were considered statistically significant (\* *p* <0.05, \*\* *p* <0.01, \*\*\* *p* <0.001). The data are expressed as the mean ± standard deviation (SD) of three independent experiments.

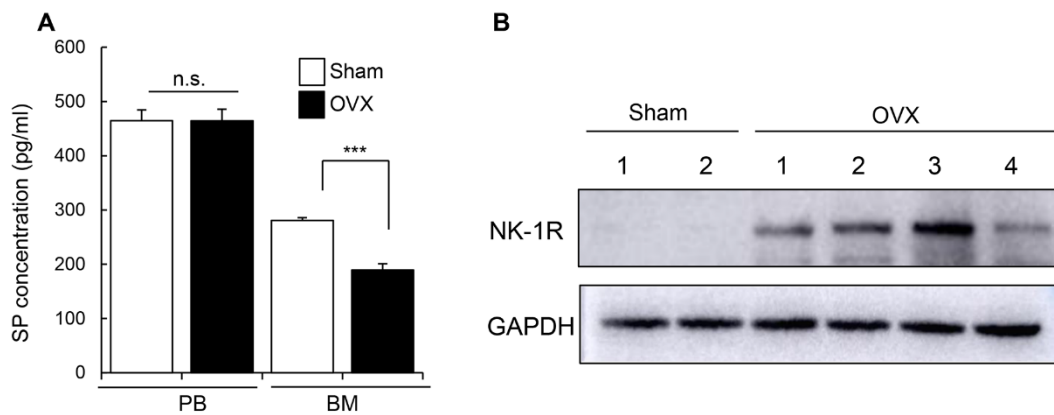

**Supplementary Figure 8. OVX downregulates SP levels in the bone marrow but upregulates NK-1R expressions after 8 weeks.** (A) The concentration of SP in bone marrow aspirates was analyzed by ELISA. (B) The level of NK-1R protein in bone marrow was elucidated by western blot analysis and quantified relatively. *p* values of less than 0.05 were considered statistically significant (\* *p* <0.05, \*\* *p* <0.01, \*\*\* *p* <0.001). The data are expressed as the mean ± standard deviation (SD) of three independent experiments.
